# Supplementary material for: Predictors of Caregiver Burden Among Carers of Suicide Attempt Survivors
Source: Atypon-hosted journal article supplement (doi:10.1027/0227-5910/a000836), 2021-12-17
Supplement: 0227-5910_a000836_esm1.pdf [file 0227-5910_a000836_esm1.pdf]

**Electronic Supplementary Material 1**

Table E1: Participant Characteristic

| Variables                                                                          | N   | %    |
|------------------------------------------------------------------------------------|-----|------|
| <b><i>Gender</i></b>                                                               |     |      |
| Male                                                                               | 68  | 10.2 |
| Female                                                                             | 582 | 87.4 |
| Transgender                                                                        | 4   | 0.6  |
| Other                                                                              | 12  | 1.8  |
| <b><i>Aboriginal and/or Torres Strait Islander descent</i></b>                     |     |      |
| Yes                                                                                | 15  | 2.3  |
| No                                                                                 | 651 | 97.7 |
| <b><i>Geographic location</i></b>                                                  |     |      |
| Metropolitan                                                                       | 348 | 52.3 |
| Regional                                                                           | 216 | 32.4 |
| Rural                                                                              | 94  | 14.1 |
| Remote                                                                             | 8   | 1.2  |
| <b><i>Number of people known who have attempted suicide</i></b>                    |     |      |
| 1                                                                                  | 174 | 26.1 |
| 2-3                                                                                | 291 | 43.7 |
| 4-5                                                                                | 98  | 14.7 |
| 5-10                                                                               | 49  | 7.4  |
| 10+                                                                                | 53  | 8.0  |
| Missing                                                                            | 1   | 0.2  |
| <b><i>Relationship to the person who attempted suicide</i></b>                     |     |      |
| Parent                                                                             | 61  | 9.2  |
| Family relation<br>(cousin, aunt, grandparent)                                     | 42  | 6.3  |
| Child                                                                              | 168 | 25.2 |
| Friend                                                                             | 156 | 23.4 |
| Sibling                                                                            | 39  | 5.9  |
| Colleague                                                                          | 8   | 1.2  |
| Partner                                                                            | 71  | 10.7 |
| Other                                                                              | 58  | 8.7  |
| Missing                                                                            | 63  | 9.5  |
| <b><i>Number of known suicide attempts by the person who attempted suicide</i></b> |     |      |
| 1                                                                                  | 189 | 28.4 |
| 2-4                                                                                | 317 | 47.6 |
| 5-10                                                                               | 68  | 10.2 |
| More than 10                                                                       | 29  | 4.4  |
| Missing                                                                            | 63  | 9.5  |
| <b><i>Time since last attempt by the person who attempted suicide</i></b>          |     |      |
| Less than 1 month                                                                  | 59  | 8.9  |
| 1-6 months                                                                         | 131 | 19.7 |
| 7-12 months                                                                        | 73  | 11.0 |
| 1-2 years                                                                          | 124 | 18.6 |
| 3-5 years                                                                          | 103 | 15.5 |
| 6-10 years                                                                         | 113 | 17.0 |
| Missing                                                                            | 63  | 9.5  |

Table E2: Summary of Sample Mean Scores of Key Study Variables

| <b>Variables</b>                                                | <b>Interpretation of Sample Mean Scores</b>                                                                                                              |
|-----------------------------------------------------------------|----------------------------------------------------------------------------------------------------------------------------------------------------------|
| Closeness                                                       | High levels of closeness with the person who attempted suicide; the mean score was above 4 on the 5-point Likert scale                                   |
| Impact                                                          | High levels of perceived impact; the mean score was above 4 on the 5-point scale                                                                         |
| Frequency of contact 6 months prior to attempt                  | High levels of frequency of contact during the six months prior to attempt; the mean score was over 5 on the 6-point scale                               |
| Frequency of contact immediately following attempt              | High levels of frequency of contact immediately following attempt; the mean score was over 5 on the 6-point frequency scale                              |
| Confidence talking to the person about suicide attempt          | Moderate levels of confidence talking to the person about their suicide attempt; the mean score fell above the mid-point on the 5-point scale            |
| Confidence supporting the person after suicide attempt          | Moderate levels of confidence supporting the person after their suicide attempt; the mean score fell above the mid-point on the 5-point scale            |
| Confidence talking to others about the person's suicide attempt | Moderate levels of confidence talking to others about the person's suicide attempt; the mean score was just over the mid-point on the 5-point scale      |
| Adequacy of healthcare the person received                      | Low levels of reported adequacy of healthcare the person received; the mean score was below 3, the mid-point on the 5-point scale                        |
| Adequacy of support carer received                              | Low levels of reported adequacy of support carer received; the mean score was below 3, the mid-point on the 5-point scale                                |
| SOSS stigma                                                     | Low levels of suicide attitudes related to stigma; the mean score was well below the mid-point on the 5-point scale                                      |
| SOSS isolation                                                  | High levels of stigmatising attitudes related to isolation; the mean score was above 4 on the 5-point scale                                              |
| SOSS glorification                                              | Low levels of stigmatising attitudes related to glorification; the mean score was well below the mid-point on the 5-point scale                          |
| Suicidal ideation                                               | High levels of suicidal ideation; the mean score was just over 7, well above the mid-point on the 11-point scale                                         |
| Psychological distress                                          | High levels of average psychological distress levels.<br>Distress levels (ABS, 2012): Very high (24.4%), High (26.4%), Moderate (25.7%), and Low (23.4%) |
| Caregiver burden                                                | High levels of caregiver burden; the mean score was above the mid-point.                                                                                 |

Table E3: Summary of Group Differences on Key Psychological Variables

| Variables              | Not well supported Group<br>( <i>n</i> =237) | Supported Group<br>( <i>n</i> =82) | <i>t</i> -values<br>(317) | Cohen's <i>d</i> |
|------------------------|----------------------------------------------|------------------------------------|---------------------------|------------------|
| Suicidal ideation      | 7.52<br>(10.74)                              | 4.88<br>(7.85)                     | 2.05*                     | .28              |
| Psychological distress | 25.04<br>(8.84)                              | 19.44<br>(8.77)                    | 4.96***                   | .64              |
| Caregiver burden       | 54.17<br>(13.53)                             | 34.54<br>(19.51)                   | 10.03***                  | 1.17             |

Note. \*  $p < .05$ , \*\*\*  $p < .001$ . Cohen's *d* effect size guidelines: .20 (small); .50 (medium); and .80 (large).
